# Supplementary material for: A quantitative FastFUCCI assay defines cell cycle dynamics at a single-cell level
Source: Oxford University Press journal article supplement (doi:10.1242/jcs.195164), 2016-11-26
Supplement: jcs195164supp.pdf [file jcs195164supp.pdf]

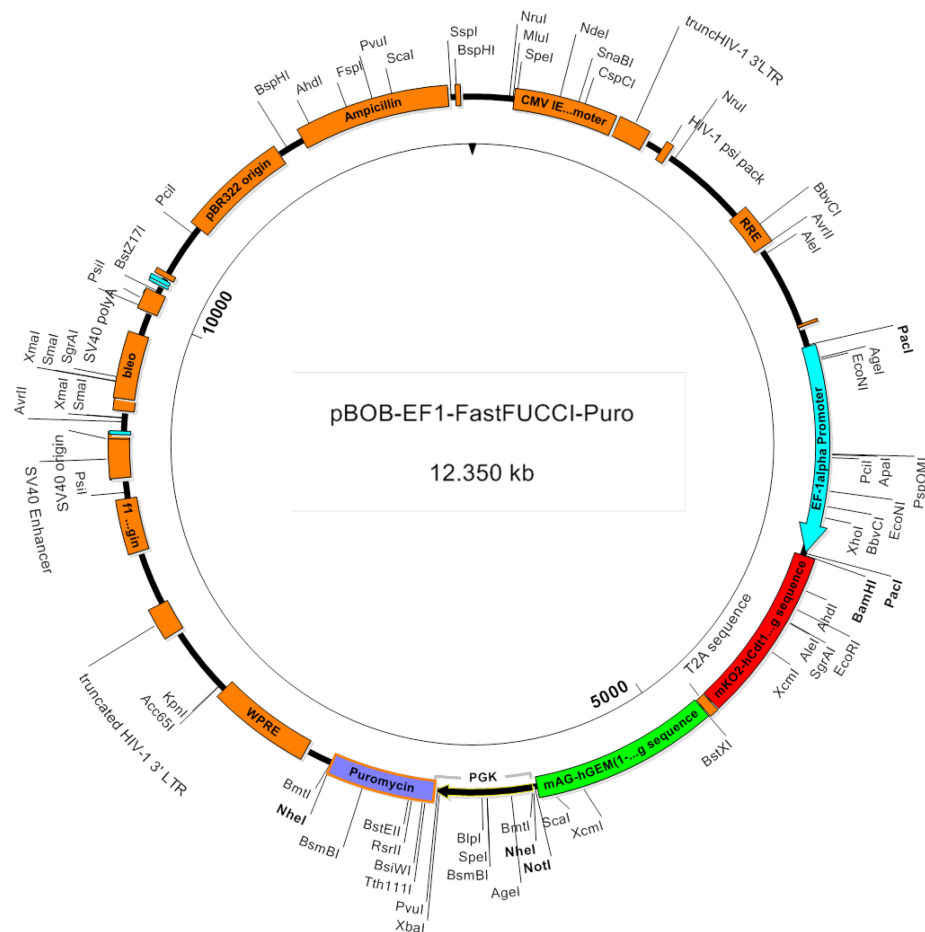

**Figure S1, related to Figure 1. pBOB-EF1-FastFUCCI-Puro construct**  
Full map of the pBOB-EF1-FastFUCCI-Puro construct. See Supplementary Table S1 for all single and two-cutter 6+ nucleotide restriction enzymes with respective positions and actual nucleotide numbers.

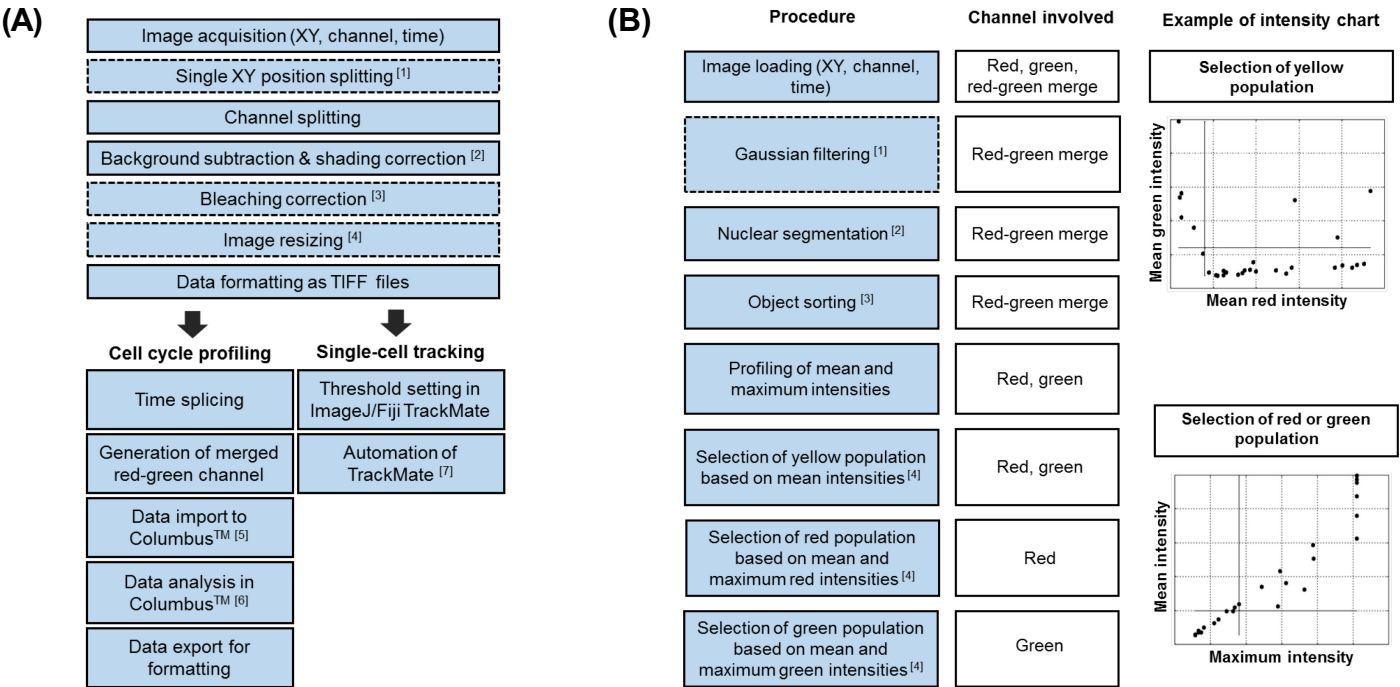

**Figure S2, related to Figure 2. FastFUCCI imaging assay**

(A) Description of the FastFUCCI imaging pipeline. <sup>[1]</sup> XY position splitting is required if imaging software generates one single merged file for the entire video acquisition. <sup>[2]</sup> Image processing should be tested on several videos for quality control prior to automation. <sup>[3]</sup> This step would be useful if there is exhibition of auto-fluorescence. Exponential fit in the ImageJ/Fiji plug-in “Bleaching correction” is recommended. <sup>[4]</sup> Image resizing is optional to expedite the analysis process but it should only be applied if it does not affect segmentation. <sup>[5]</sup> Data import requires a switch from “Project” to “Screen” mode within the Columbus™ software to allow for batch mode analysis. <sup>[6]</sup> Analysis protocol is in (B). <sup>[7]</sup> Automation is achieved by the AutoClick Robot software (Java code), with a GUI to schedule click events. Red and green channels could be analysed separately if selected thresholds preclude batch analysis. Data export is included in the automation. (B) Protocol for Columbus™ analysis. <sup>[1]</sup> Gaussian filtering could be performed to improve contour definition for nuclear segmentation. <sup>[2-4]</sup> Thresholds for segmentation, nuclear size and red/green intensities are user-defined prior to batch analysis. <sup>[3]</sup> Objects near the periphery of field of view, as well as abnormally small and large objects are discarded during sorting. <sup>[4]</sup> Once an object is classified, it would be excluded from subsequent selection.

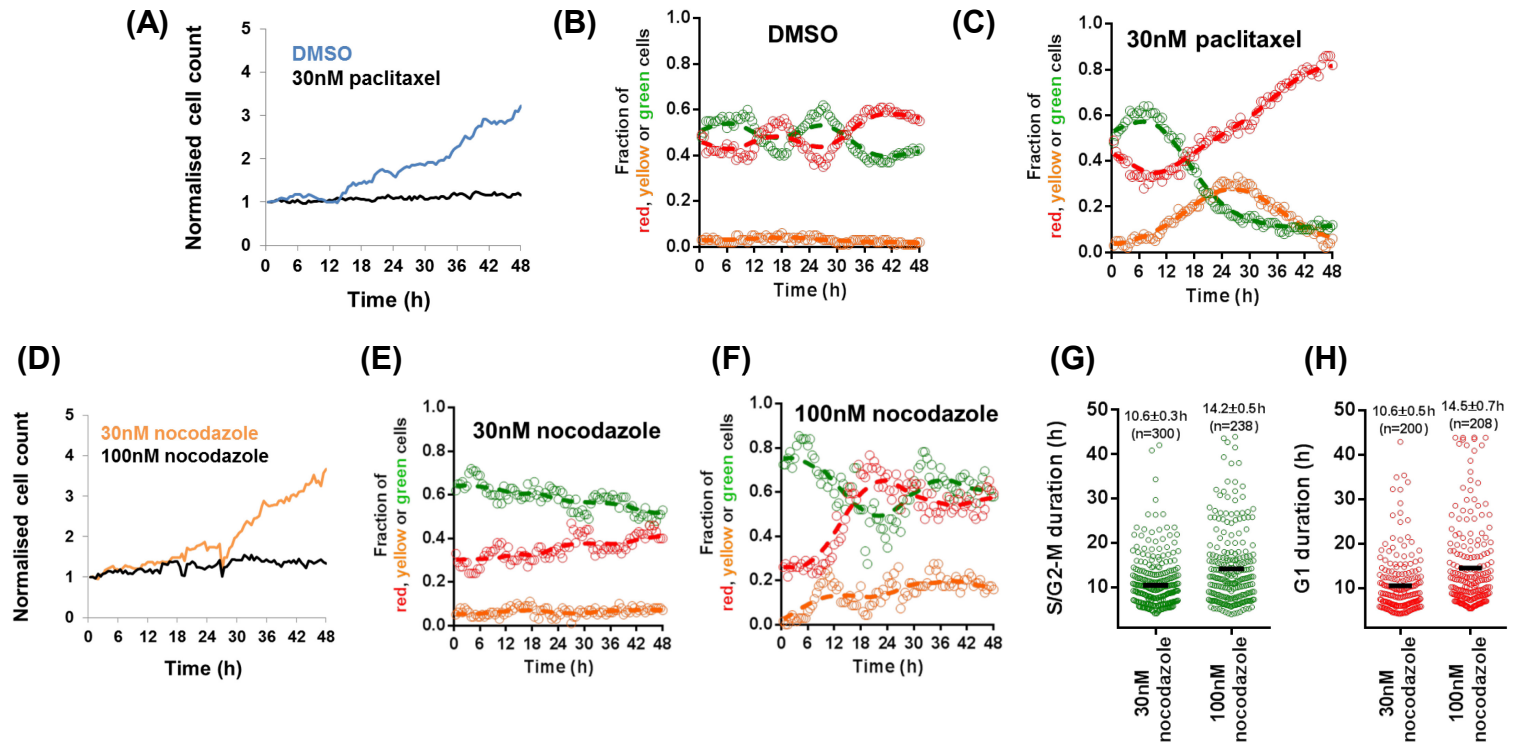

**Figure S3, related to Figure 3. Real-time quantification of cell cycle modulation**

(A-C) Real-time monitoring of FastFucci-expressing Panc-1 cells treated as indicated. Data shown were from five fields of view per time-point, with a mean total of 15,684 cells per condition scored. (D-F) Real-time monitoring of FastFucci-expressing MIA PaCa-2 cells treated as indicated. Data shown were from three fields of view per time-point, with a mean total of 11,226 cells per condition scored. (G) S/G2-M and (H) G1 duration of individual FastFucci-expressing MIA PaCa-2 cells treated as indicated. Duration is reported as mean  $\pm$  SEM, n=number of cells, collected from imaging for 72 hours after drug addition. (D-H) Corresponding data for DMSO control are in Figure 3.

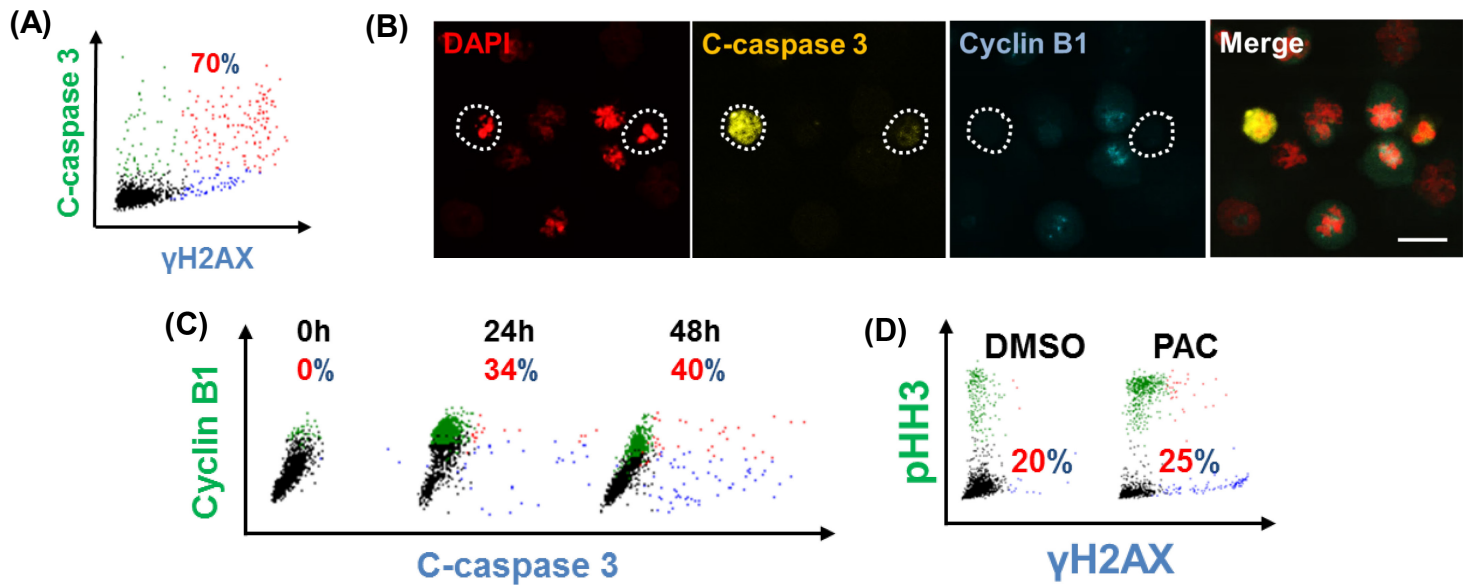

**Figure S4, related to Figure 5. Correlation of paclitaxel-induced cell death and mitosis**

(A) Quantification of parental MIA PaCa-2 cells treated with 30 nM paclitaxel for 24 hours. Each dot represents a single cell: black dot denotes negative cell, blue dot denotes  $\gamma$ H2AX-positive cell, green dot denotes c-caspase 3-positive cell, red dot denotes  $\gamma$ H2AX/c-caspase 3 double positive cell. Number denotes percentage of c-caspase 3-positive cells that were positive for  $\gamma$ H2AX. (B) Immunofluorescence of parental Panc-1 cells treated with 30 nM paclitaxel for 24 hours. Scale bar, 25  $\mu$ m. (C) Quantification of parental Panc-1 cells treated with 30 nM paclitaxel over the course of 48 hours. Each dot represents a single cell: black dot denotes negative cell, blue dot denotes c-caspase 3-positive cell, green dot denotes cyclin B1-positive cell, red dot denotes c-caspase 3/cyclin B1 double positive cell. Number denotes percentage of c-caspase 3-positive cells that were positive for cyclin B1. (D) Quantification of parental Panc-1 cells treated with vehicle or 30 nM paclitaxel for 48 hours. Each dot represents a single cell: black dot denotes negative cell, blue dot denotes  $\gamma$ H2AX-positive cell, green dot denotes pHH3-positive cell, red dot denotes  $\gamma$ H2AX/pHH3 double positive cell. Number denotes percentage of  $\gamma$ H2AX-positive cells that were positive for pHH3. (A, C, D) A total of >2000 single cells per sample were scored.

**Table S1, related to Figure 1.** All single and two-cutter 6+ nucleotide restriction enzymes with respective positions and actual nucleotide numbers

| Name    | Frequency | Position                    |
|---------|-----------|-----------------------------|
| Acc65I  | 1         | 7761 (12350)                |
| AgeI    | 2         | 2607 (3352), 5959 (8998)    |
| AhdI    | 2         | 3904 (7524), 11428 (4826)   |
| AleI    | 2         | 1954 (2146), 4100 (10204)   |
| Apal    | 1         | 3146 (12350)                |
| AvrII   | 2         | 1911 (7480), 9391 (4870)    |
| BamHI   | 1         | 3722 (12350)                |
| BbvCI   | 2         | 1801 (1630), 3431 (10720)   |
| BlpI    | 1         | 6122 (12350)                |
| BmtI    | 2         | 5834 (1162), 6996 (11188)   |
| BsiWI   | 1         | 6448 (12350)                |
| BsmBI   | 2         | 6094 (690), 6784 (11660)    |
| BspHI   | 2         | 11255 (1008), 12263 (11342) |
| BstEII  | 1         | 6526 (12350)                |
| BstXI   | 1         | 4771 (12350)                |
| BstZ17I | 1         | 10156 (12350)               |
| CspCI   | 1         | 628 (12350)                 |
| EcoNI   | 2         | 2618 (728), 3346 (11622)    |
| EcoRI   | 1         | 4016 (12350)                |
| FspI    | 1         | 11650 (12350)               |
| KpnI    | 1         | 7765 (12350)                |
| MluI    | 1         | 230 (12350)                 |
| NdeI    | 1         | 486 (12350)                 |
| NheI    | 2         | 5830 (1162), 6992 (11188)   |
| NotI    | 1         | 5823 (12350)                |
| NruI    | 2         | 210 (1000), 1210 (11350)    |
| PacI    | 2         | 2520 (1192), 3712 (11158)   |
| PciI    | 2         | 3162 (7373), 10535 (4977)   |
| PsiI    | 2         | 8992 (1051), 10043 (11299)  |
| PspOMI  | 1         | 3142 (12350)                |
| PvuI    | 2         | 6372 (5426), 11798 (6924)   |
| RsrII   | 1         | 6508 (12350)                |
| Scal    | 2         | 5771 (6137), 11908 (6213)   |
| SgrAI   | 2         | 4097 (5537), 9634 (6813)    |
| SmaI    | 2         | 9414 (196), 9610 (12154)    |
| SnaBI   | 1         | 592 (12350)                 |
| SpeI    | 2         | 251 (5843), 6094 (6507)     |
| SspI    | 1         | 12232 (12350)               |
| Tth111I | 1         | 6434 (12350)                |
| XbaI    | 1         | 6360 (12350)                |
| XcmI    | 2         | 4282 (1302), 5584 (11048)   |
| XhoI    | 1         | 3494 (12350)                |
| XmaI    | 2         | 9412 (196), 9608 (12154)    |
